# Supplementary material for: Tuning slow magnetic relaxation behaviour in a {Dy2}-based one-dimensional chain via crystal field perturbation
Source: Royal Society of Chemistry journal article supplement (doi:10.1039/d0ra01604g), 2020-01-01
Supplement: d0ra01604g1.pdf [file d0ra01604g1.pdf]

## Electronic Supplementary Information

### Tuning slow magnetic relaxation behaviour in $\{\text{Dy}_2\}$ -based one-dimensional chain via crystal field perturbation

Shui Yu,<sup>a</sup> Qinhua Zhang,<sup>c</sup> Huancheng Hu,<sup>\*,a</sup> Zilu Chen,<sup>\*,a</sup> Dongcheng Liu,<sup>a</sup> Yuning Liang<sup>a</sup> and Fupei Liang<sup>\*,a, b</sup>

<sup>a</sup> State Key Laboratory for Chemistry and Molecular Engineering of Medicinal Resources, School of Chemistry and Pharmaceutical Sciences, Guangxi Normal University, Guilin 541004, P. R. China. E-mail: zlchen@mailbox.gxnu.edu.cn; siniantongnian@126.com; fliangoffice@yahoo.com

<sup>b</sup> Guangxi Key Laboratory of Electrochemical and Magnetochemical Functional Materials, College of Chemistry and Bioengineering, Guilin University of Technology, Guilin, 541004, P. R. China. E-mail: fliangoffice@yahoo.com

<sup>c</sup> State Key Laboratory of Heavy Oil Processing, Institute of New Energy, College of Chemical Engineering, China University of Petroleum (East China), Qingdao 266580, P. R. China.

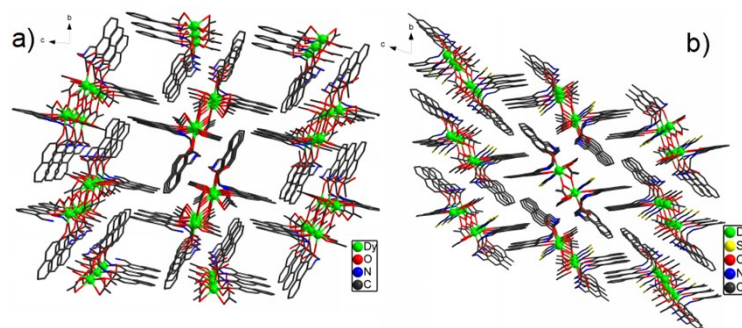

**Fig. S1** The molecular packing structures of **1** (a) and **2** (b) viewed along the *a* axis (H atoms and solvent molecules are omitted for clarity).

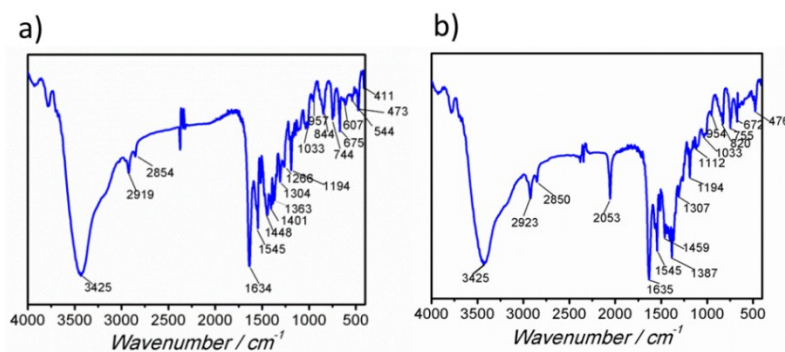

**Fig. S2** FT-IR spectrum of **1** (a) and **2** (b).

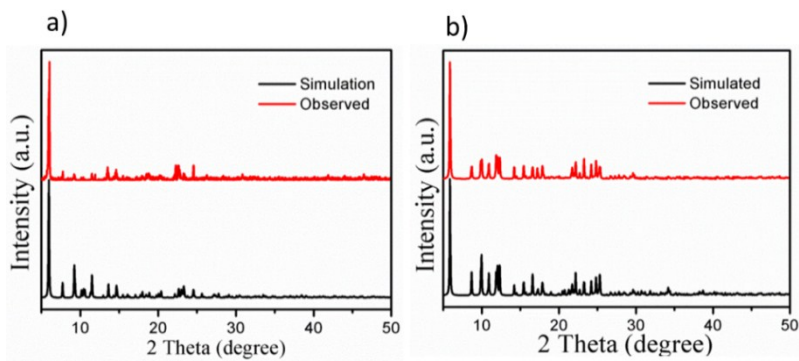

**Fig. S3** PXR D patterns of **1** (a) and **2** (b).

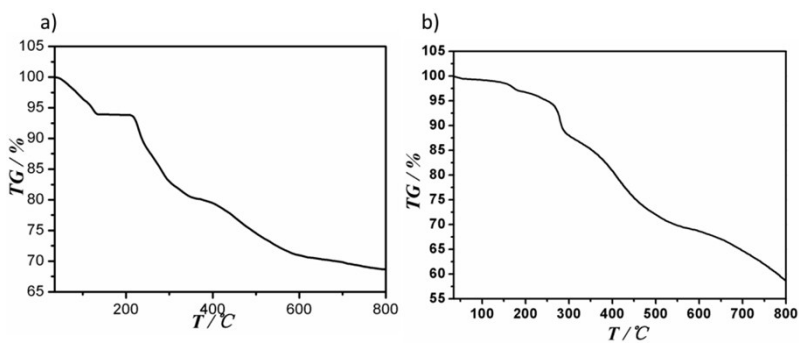

**Fig. S4** The TGA curves for **1** (a) and **2** (b).

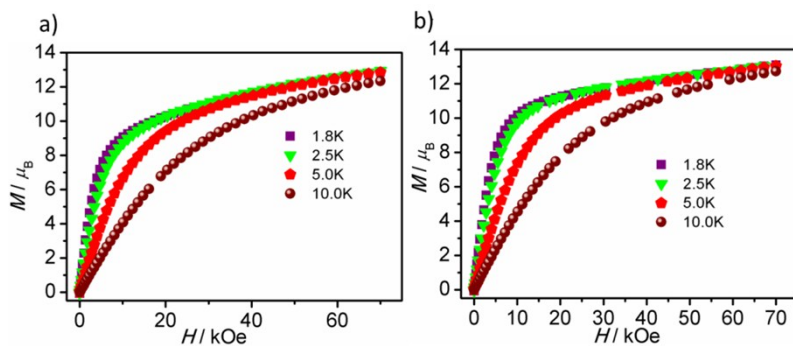

**Fig. S5**  $M$  vs.  $H$  plots under different temperatures for **1** (a) and **2** (b).

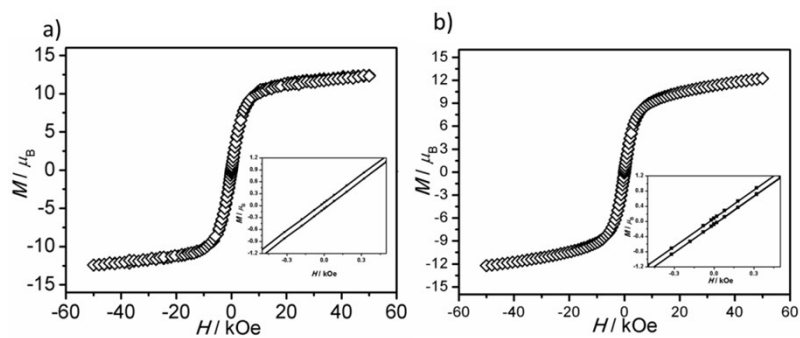

**Fig. S6** Plots of magnetic hysteresis loops for **1** (a) and **2** (b).

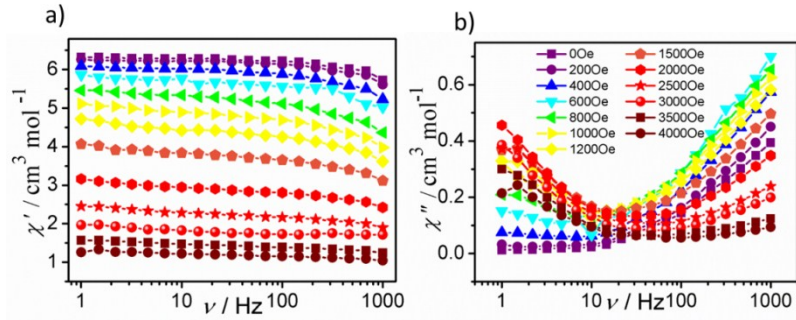

**Fig. S7** Frequency-dependent in-phase ( $\chi'$ ) and out-phase ( $\chi''$ ) ac susceptibilities under different dc fields at 2.0 K for **1**.

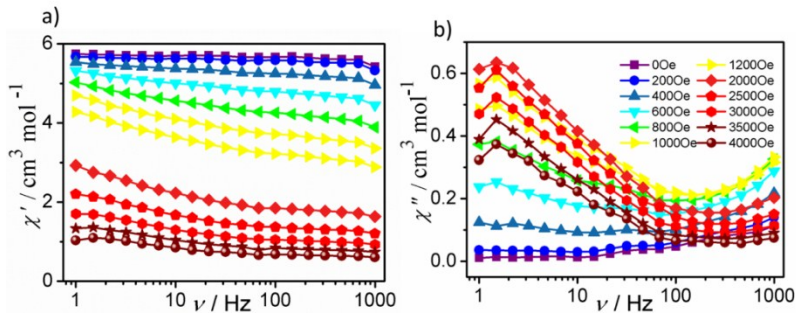

**Fig. S8** Frequency-dependent in-phase ( $\chi'$ ) and out-phase ( $\chi''$ ) ac susceptibilities under different dc fields at 2.0 K for **2**.

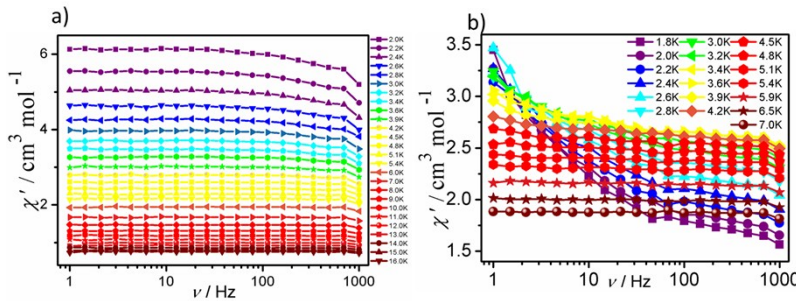

**Fig. S9** Frequency-dependent in-phase ( $\chi'$ ) ac susceptibilities for **1** (a) and **2** (b) under zero dc field.

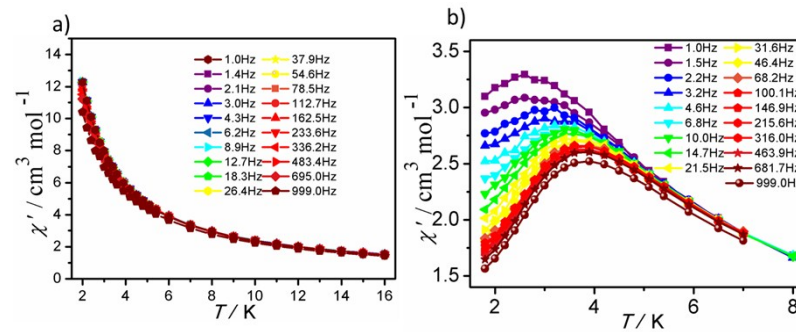

**Fig. S10** Temperature dependence of the in-phase ( $\chi'$ ) ac susceptibilities under 0 Oe in the

frequency range of 1-1000 Hz for **1** (a) and **2** (b).

**Table S1.** Crystallographic data of **1** and **2**.

| Compound                                            | <b>1</b>                                                                       | <b>2</b>                                                                                      |
|-----------------------------------------------------|--------------------------------------------------------------------------------|-----------------------------------------------------------------------------------------------|
| Formula                                             | C <sub>64</sub> H <sub>68</sub> Dy <sub>2</sub> N <sub>4</sub> O <sub>20</sub> | C <sub>62</sub> H <sub>64</sub> Dy <sub>2</sub> N <sub>6</sub> O <sub>16</sub> S <sub>2</sub> |
| fw                                                  | 1538.22                                                                        | 1538.31                                                                                       |
| <i>T</i> / K                                        | 293(2)                                                                         | 293(2)                                                                                        |
| $\lambda$ / Å                                       | 0.71073                                                                        | 0.71073                                                                                       |
| Crystal system                                      | triclinic                                                                      | triclinic                                                                                     |
| Space group                                         | <i>P</i> $\bar{1}$                                                             | <i>P</i> $\bar{1}$                                                                            |
| <i>a</i> / Å                                        | 9.9272(2)                                                                      | 9.9101(6)                                                                                     |
| <i>b</i> / Å                                        | 11.8458(4)                                                                     | 11.7555(5)                                                                                    |
| <i>c</i> / Å                                        | 15.0341(4)                                                                     | 15.8011(5)                                                                                    |
| $\alpha$ / °                                        | 83.259(3)                                                                      | 73.569(3)                                                                                     |
| $\beta$ / °                                         | 82.471(2)                                                                      | 88.693(4)                                                                                     |
| $\gamma$ / °                                        | 76.012(2)                                                                      | 65.351(5)                                                                                     |
| <i>V</i> / Å <sup>3</sup>                           | 1693.97(8)                                                                     | 1595.15(12)                                                                                   |
| <i>Z</i>                                            | 1                                                                              | 1                                                                                             |
| <i>D</i> <sub>c</sub> / g cm <sup>-3</sup>          | 1.508                                                                          | 1.603                                                                                         |
| $\mu$ / mm <sup>-1</sup>                            | 2.261                                                                          | 2.461                                                                                         |
| <i>F</i> (000)                                      | 772.0                                                                          | 772.0                                                                                         |
| $\theta$ / °                                        | 3.34-25.000                                                                    | 3.27-25.000                                                                                   |
| Reflns collected                                    | 25041                                                                          | 22939                                                                                         |
| Reflns unique                                       | 5943                                                                           | 5598                                                                                          |
| <i>R</i> <sub>int</sub>                             | 0.0271                                                                         | 0.0535                                                                                        |
| GOF on <i>F</i> <sup>2</sup>                        | 1.105                                                                          | 1.066                                                                                         |
| <i>R</i> <sub>1</sub> [ <i>I</i> > 2σ( <i>I</i> )]  | 0.0356                                                                         | 0.0459                                                                                        |
| <i>wR</i> <sub>2</sub> [ <i>I</i> > 2σ( <i>I</i> )] | 0.1048                                                                         | 0.1351                                                                                        |

|                   |        |        |
|-------------------|--------|--------|
| $R_1$ (all data)  | 0.0369 | 0.0510 |
| $wR_2$ (all data) | 0.1068 | 0.1419 |

**Table S2.** Selected bond lengths and bond angles of **1**

|            |             |             |             |            |             |
|------------|-------------|-------------|-------------|------------|-------------|
| Dy1-O1     | 2.304 (3)   | Dy1-O3A     | 2.285 (2)   | Dy1-O4     | 2.449 (3)   |
| Dy1-O5     | 2.410 (3)   | Dy1-O6      | 2.553 (3)   | Dy1-O6B    | 2.349 (3)   |
| Dy1-O7     | 2.452 (3)   | Dy1-O8      | 2.510 (4)   | Dy1-O9     | 2.566 (4)   |
| O3B-Dy1-O1 | 87.00 (12)  | O3B-Dy1-O4  | 86.37 (12)  | O3B-Dy1-O5 | 78.63 (12)  |
| O3B-Dy1-O6 | 124.66 (11) | O3B-Dy1-O6A | 163.11 (12) | O3B-Dy1-O7 | 76.03 (11)  |
| O3B-Dy1-O8 | 118.84 (10) | O3B-Dy1-O9  | 69.35 (12)  | O5-Dy1-O1  | 125.53 (8)  |
| O5-Dy1-O4  | 53.02 (11)  | O5-Dy1-O7   | 76.94 (12)  | O5-Dy1-O9  | 138.43 (12) |
| O6-Dy1-O1  | 147.40 (10) | O6-Dy1-O4   | 111.91 (11) | O6-Dy1-O5  | 74.00 (11)  |
| O6-Dy1-O7  | 51.54 (10)  | O6-Dy1-O9   | 102.96 (11) | O6A-Dy1-O1 | 85.74 (11)  |
| O6A-Dy1-O4 | 76.98 (12)  | O6A-Dy1-O5  | 93.26 (12)  | O6A-Dy1-O7 | 116.88 (10) |
| O6A-Dy1-O9 | 123.97 (12) | O7-Dy1-O1   | 148.94 (12) | O7-Dy1-O4  | 129.42 (11) |
| O7-Dy1-O9  | 70.25 (12)  | O8-Dy1-O1   | 86.77 (13)  | O8-Dy1-O4  | 147.68 (13) |
| O8-Dy1-O5  | 145.67 (13) | O8-Dy1-O7   | 79.25 (13)  | O8-Dy1-O9  | 49.70 (12)  |
| O9-Dy1-O1  | 79.52 (12)  | O9-Dy1-O4   | 144.78 (12) |            |             |

Symmetry codes: (A) 1-X, 2-Y, 1-Z; (B) -1+X,+Y,+Z; (C) 1+X,+Y,+Z.

**Table S3.** Selected bond lengths and bond angles of **2**

|            |             |             |             |             |             |
|------------|-------------|-------------|-------------|-------------|-------------|
| Dy1-O1     | 2.290 (4)   | Dy1-O3      | 2.270 (4)   | Dy1-O4      | 2.354 (4)   |
| Dy1-O4B    | 2.482 (4)   | Dy1-O5B     | 2.501 (5)   | Dy1-O6      | 2.422 (5)   |
| Dy1-O7     | 2.423 (5)   | Dy1-N3      | 2.378 (9)   | O1-Dy1-O4   | 83.83 (15)  |
| O1-Dy1-O4A | 147.02 (15) | O1-Dy1-O5A  | 150.83 (16) | O1-Dy1-O6   | 125.31 (17) |
| O1-Dy1-O7  | 73.88 (16)  | O1-Dy1-N3   | 85.0 (2)    | O3B-Dy1-O1  | 84.03 (16)  |
| O3B-Dy1-O4 | 165.86 (17) | O3B-Dy1-O4A | 126.36 (16) | O3B-Dy1-O5A | 75.11 (16)  |
| O3A-Dy1-O6 | 84.51 (18)  | O3A-Dy1-O7  | 89.41 (19)  | O3B-Dy1-N3  | 97.0 (4)    |
| O4-Dy1-O4A | 67.24 (17)  | O4-Dy1-O5A  | 118.77 (14) | O4-Dy1-O6   | 96.65 (17)  |
| O4-Dy1-O7  | 80.27 (18)  | O4-Dy1-N3   | 89.2(3)     | O4A-Dy1-O5A | 51.63 (14)  |

|            |             |            |            |            |             |
|------------|-------------|------------|------------|------------|-------------|
| O6-Dy1-O4A | 75.55 (16)  | O6-Dy1-O5A | 73.30 (17) | O7-Dy1-O4A | 114.22 (16) |
| O7-Dy1-O5A | 125.11 (16) | O7-Dy1-O6  | 52.71 (17) | N3-Dy1-O4A | 79.3 (3)    |
| N3-Dy1-O5A | 77.7 (2)    | N3-Dy1-O6  | 149.5 (2)  | N3-Dy1-O7  | 157.2 (3)   |

Symmetry codes: (A)  $-1+X,+Y,+Z$ ; (B)  $2-X,1-Y,1-Z$ ; (C)  $1+X,+Y,+Z$ .

**Table S4.** SHAPE analysis of **1**

| Configuration                                   | ABOXIY       |
|-------------------------------------------------|--------------|
| Enneagon ( $D_{9h}$ )                           | 32.533       |
| Octagonal pyramid ( $C_{8v}$ )                  | 23.383       |
| Heptagonal bipyramid ( $D_{7h}$ )               | 15.822       |
| Johnson triangular cupola J3 ( $C_{3v}$ )       | 13.162       |
| Capped cube J8 ( $C_{4v}$ )                     | 8.743        |
| Spherical-relaxed capped cube ( $C_{4v}$ )      | 7.790        |
| Capped square antiprism J10 ( $C_{4v}$ )        | 3.582        |
| Spherical capped square antiprism ( $C_{4v}$ )  | 2.886        |
| Tricapped trigonal prism J51 ( $D_{3h}$ )       | 3.712        |
| Spherical tricapped trigonal prism ( $D_{3h}$ ) | 3.288        |
| Tridiminished icosahedron J63 ( $C_{3v}$ )      | 10.615       |
| Hula-hoop ( $C_{2v}$ )                          | 9.196        |
| <b>Muffin (<math>C_s</math>)</b>                | <b>2.817</b> |

**Table S5.** SHAPE analysis of **2**

| Configuration                                           | ABOXIY       |
|---------------------------------------------------------|--------------|
| Octagon ( $D_{8h}$ )                                    | 31.613       |
| Heptagonal pyramid ( $C_{7v}$ )                         | 23.501       |
| Hexagonal bipyramid ( $D_{6h}$ )                        | 13.320       |
| Cube ( $O_h$ )                                          | 11.043       |
| Square antiprism ( $D_{4d}$ )                           | 4.374        |
| <b>Triangular dodecahedron (<math>D_{2d}</math>)</b>    | <b>3.308</b> |
| Johnson gyrobifastigium J26 ( $D_{2d}$ )                | 11.008       |
| Johnson elongated triangular bipyramid J14 ( $D_{3h}$ ) | 27.405       |
| Biaugmented trigonal prism J50 ( $C_{2v}$ )             | 3.969        |
| Biaugmented trigonal prism ( $C_{2v}$ )                 | 3.547        |
| Snub diphonoid J84 ( $D_{2d}$ )                         | 4.249        |
| Triakis tetrahedron ( $T_d$ )                           | 11.870       |
| Elongated trigonal bipyramid ( $D_{3h}$ )               | 23.693       |
